# Supplementary material for: Effect of room temperature transport vials on DNA quality and phylogenetic composition of faecal microbiota of elderly adults and infants
Source: Microbiome. 2016 May 10;4:19. doi: 10.1186/s40168-016-0164-3 (PMC4862223; doi:10.1186/s40168-016-0164-3)
Supplement: Additional file 8: Table S3. — Primers and barcode sequences used in the study. (XLSX 13 kb) [file 40168_2016_164_MOESM8_ESM.xlsx]

## Sheet: Sheet1
	Oligoname	Barcode	Linker	Forward Primer (520F)		Whole Forward Primer	Length (bp)
	V4F_7	AACCGGAA	AA	AYTGGGYDTAAAGNG		AACCGGAAAAAYTGGGYDTAAAGNG	25
	V4F_78	ACACTGTG	AA	AYTGGGYDTAAAGNG		ACACTGTGAAAYTGGGYDTAAAGNG	25
	V4F_139	ACGATCCA	AA	AYTGGGYDTAAAGNG		ACGATCCAAAAYTGGGYDTAAAGNG	25
	V4F_272	AGGTACGA	AA	AYTGGGYDTAAAGNG		AGGTACGAAAAYTGGGYDTAAAGNG	25
	V4F_494	CATCGTTC	AA	AYTGGGYDTAAAGNG		CATCGTTCAAAYTGGGYDTAAAGNG	25
	V4F_632	CGTATTGG	AA	AYTGGGYDTAAAGNG		CGTATTGGAAAYTGGGYDTAAAGNG	25
	V4F_693	CTCTACAC	AA	AYTGGGYDTAAAGNG		CTCTACACAAAYTGGGYDTAAAGNG	25
	V4F_948	GCTACGTA	AA	AYTGGGYDTAAAGNG		GCTACGTAAAAYTGGGYDTAAAGNG	25
	V4F_1062	GTAGTGGA	AA	AYTGGGYDTAAAGNG		GTAGTGGAAAAYTGGGYDTAAAGNG	25
	V4F_1116	GTGTCAGT	AA	AYTGGGYDTAAAGNG		GTGTCAGTAAAYTGGGYDTAAAGNG	25
	V4F_1178	TACGAAGG	AA	AYTGGGYDTAAAGNG		TACGAAGGAAAYTGGGYDTAAAGNG	25
	V4F_1247	TCAGCACA	AA	AYTGGGYDTAAAGNG		TCAGCACAAAAYTGGGYDTAAAGNG	25
	V4F_1430	TGGAGTTC	AA	AYTGGGYDTAAAGNG		TGGAGTTCAAAYTGGGYDTAAAGNG	25
	Oligoname	Barcode	Linker	Reverse Primer (926R)		Whole Reverse Primer	Length (bp)
	V5R_22	AACGGCTT	TT	CCGTCAATTYYTTTRAGTTT		AACGGCTTTTCCGTCAATTYYTTTRAGTTT	30
	V5R_125	ACCTTGCT	TT	CCGTCAATTYYTTTRAGTTT		ACCTTGCTTTCCGTCAATTYYTTTRAGTTT	30
	V5R_341	ATCGAACC	TT	CCGTCAATTYYTTTRAGTTT		ATCGAACCTTCCGTCAATTYYTTTRAGTTT	30
	V5R_452	CAGAACTC	TT	CCGTCAATTYYTTTRAGTTT		CAGAACTCTTCCGTCAATTYYTTTRAGTTT	30
	V5R_555	CCTACGAA	TT	CCGTCAATTYYTTTRAGTTT		CCTACGAATTCCGTCAATTYYTTTRAGTTT	30
	V5R_592	CGATATGC	TT	CCGTCAATTYYTTTRAGTTT		CGATATGCTTCCGTCAATTYYTTTRAGTTT	30
	V5R_889	GATGCAAG	TT	CCGTCAATTYYTTTRAGTTT		GATGCAAGTTCCGTCAATTYYTTTRAGTTT	30
	V5R_992	GGATGGTA	TT	CCGTCAATTYYTTTRAGTTT		GGATGGTATTCCGTCAATTYYTTTRAGTTT	30
	V5R_1108	GTGATCTG	TT	CCGTCAATTYYTTTRAGTTT		GTGATCTGTTCCGTCAATTYYTTTRAGTTT	30
	V5R_1234	TCACCTGT	TT	CCGTCAATTYYTTTRAGTTT		TCACCTGTTTCCGTCAATTYYTTTRAGTTT	30
	V5R_1463	TGTCTCAC	TT	CCGTCAATTYYTTTRAGTTT		TGTCTCACTTCCGTCAATTYYTTTRAGTTT	30
	V5R_1526	TTGCGCTT	TT	CCGTCAATTYYTTTRAGTTT		TTGCGCTTTTCCGTCAATTYYTTTRAGTTT	30
